# Supplementary material for: A new hybrid nanocomposite electrode based on Au/CeO2-decorated functionalized glassy carbon microspheres for the voltammetric sensing of quercetin and its interaction with DNA
Source: Royal Society of Chemistry journal article supplement (doi:10.1039/d0ay00507j), 2020-01-01
Supplement: d0ay00507j1.pdf [file d0ay00507j1.pdf]

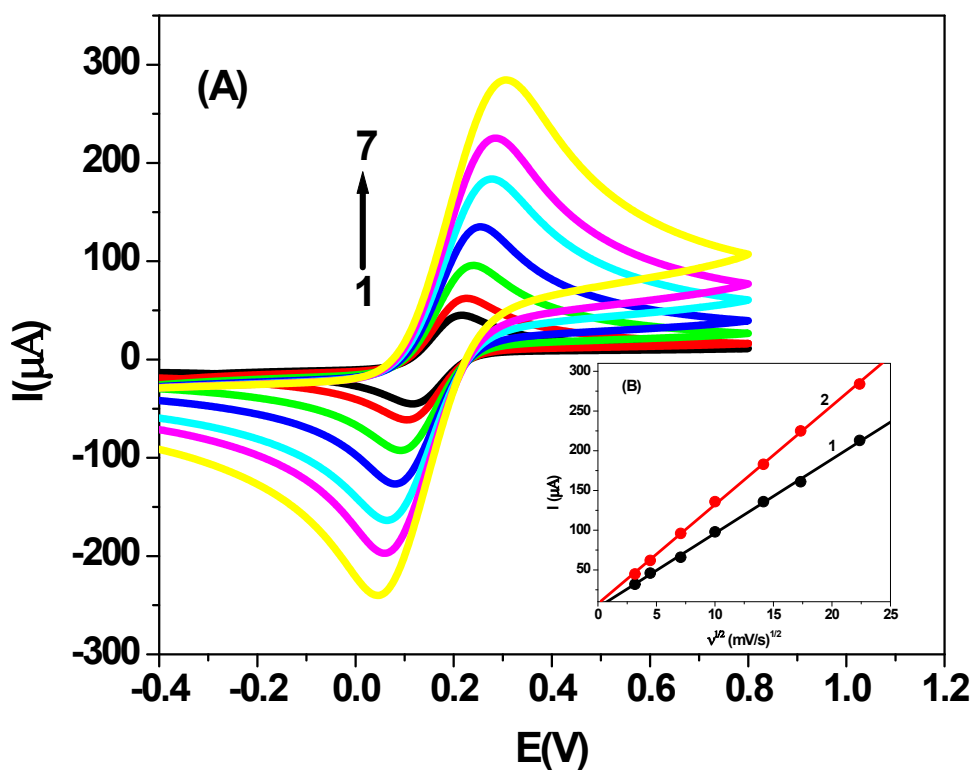

**Fig.S1.** (A) CV profiles of the Au/CeO<sub>2</sub>@FGCM-PE for 5 mM [Fe(CN)<sub>6</sub>]<sup>3-/4-</sup> in 0.1 M KCl with different scan rates (1-7) (10, 20, 50, 100, 200, 300, 500 mVs<sup>-1</sup>). (B) Plot of  $I_{pa}$  vs.  $v^{1/2}$  (1) at FGCM-PE and (2) at Au/CeO<sub>2</sub>@FGCM-PE.

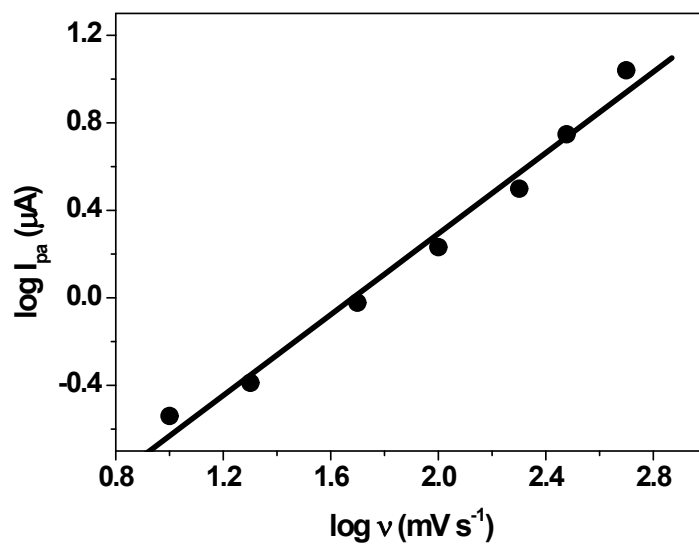

**Fig. S2.** Plot of  $\log I_{pa}$  ( $\mu\text{A}$ ) vs.  $\log v$  ( $\text{mV s}^{-1}$ ) at Au/CeO<sub>2</sub>@FGCM-PE in presence of 10  $\mu\text{M}$  QRT at PBS of pH 3.2.

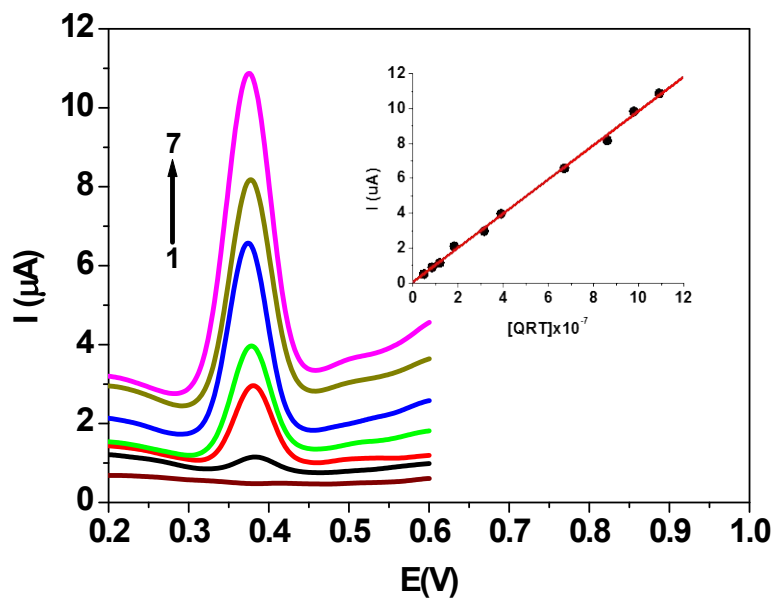

**Fig.S3.** SW voltammograms of QRT at Au/CeO<sub>2</sub>@FGCM-PE in PBS at pH 3.2 [QRT]: 1) blank, 2)  $1.18 \times 10^{-7}$ , 3)  $3.15 \times 10^{-7}$ , 4)  $3.90 \times 10^{-7}$ , 5)  $6.70 \times 10^{-7}$ , 6)  $8.59 \times 10^{-7}$ , and 7)  $1.09 \times 10^{-6}$  M QRT. Inset: Calibration plot of  $I_p$  ( $\mu\text{A}$ ) versus [QRT]. Starting potential, 0.0 V; equilibrium time, 30s; frequency, 50 Hz and pulse height, 15 mVpp.

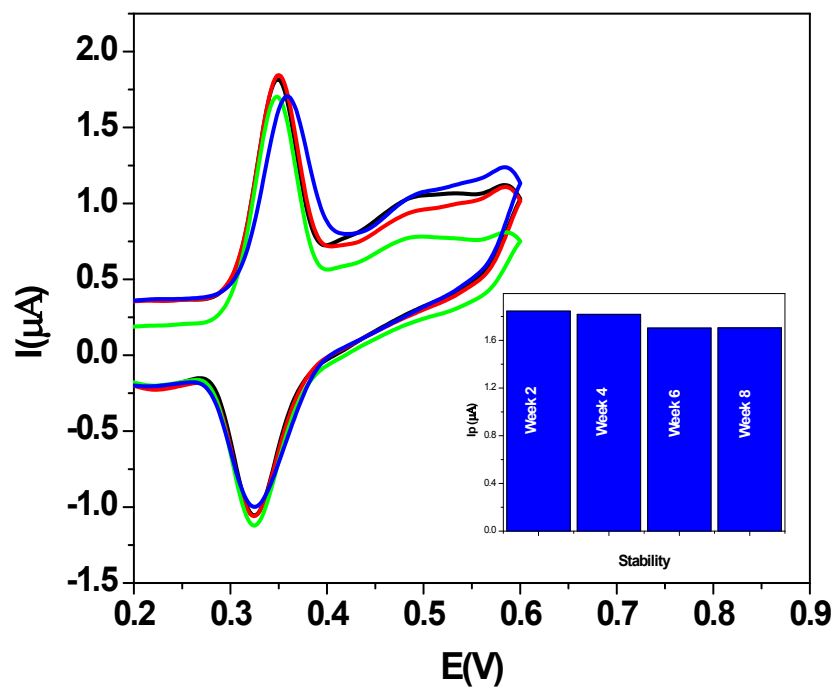

**Fig. S4.** The CV response of Au/CeO<sub>2</sub>@FGCM-PE for the detection of 10 μM QRT in PBS solution (pH 3.2) for eight weeks. Inset shows the calibrated histogram of stability test.

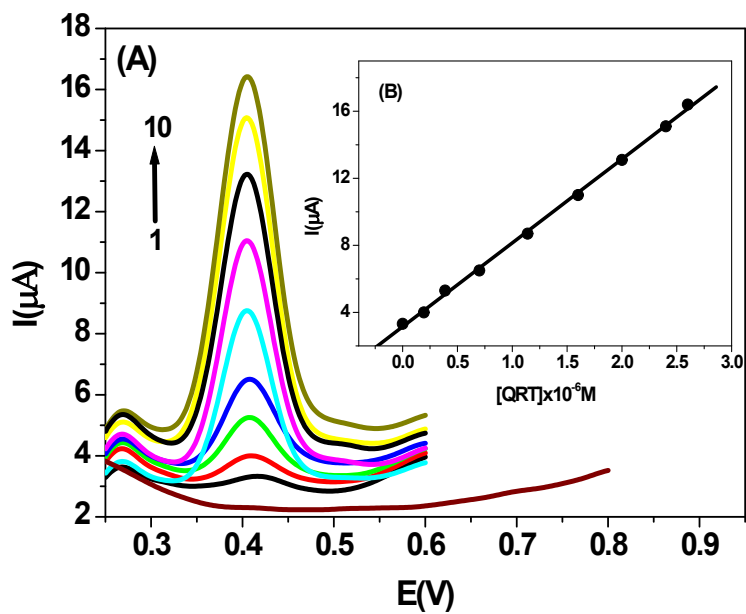

**Fig.S5. (A)** SWV of honeysuckle sample at Au/CeO<sub>2</sub>@FGCM-PE in phosphate buffer solution (pH = 3.2) (1) background (2) honeysuckle sample; standard addition of (3) 0.194, (4) 0.387, (5) 0.700, (6) 1.14, (7) 1.60, (8) 2.00, (9) 2.40, and (10) 2.60  $\mu\text{M}$  QRT. **(B)** Calibration plot of  $I_p$  ( $\mu\text{A}$ ) versus  $[\text{QRT}]$ . Other condition as in Fig.S3.

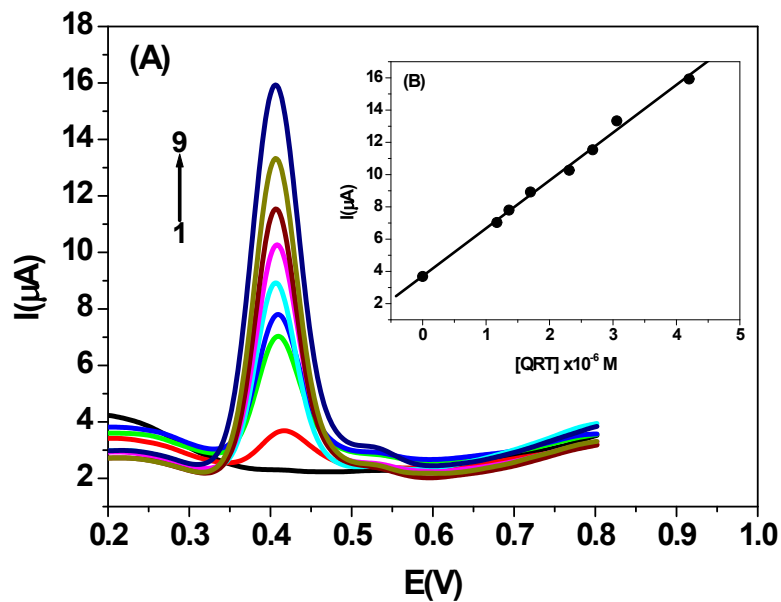

**Fig.S6.** (A) SWV of green tea sample at Au/CeO<sub>2</sub>@FGCM-PE in phosphate buffer solution (pH = 3.2) (1) background (2) green tea sample; standard addition of (3) 1.17, (4) 1.36, (5) 1.7, (6) 2.31, (7) 2.68, (8) 3.06 and (9) 4.20  $\mu\text{M}$  QRT. (B) Calibration plot of  $I_p$  ( $\mu\text{A}$ ) versus [QRT]. Other condition as in Fig.S3.

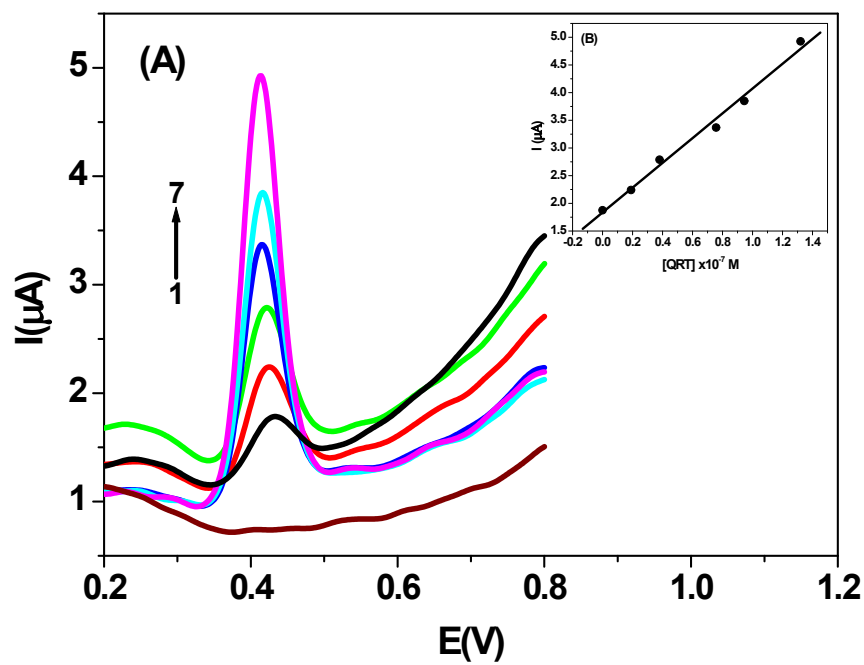

**Fig.S7.** (A) SWV of apple juice sample at Au/CeO<sub>2</sub>@FGCM-PE in phosphate buffer solution (pH = 3.2) (1) background (2) apple juice sample; standard addition of (3) 0.190, (4) 0.380 (5) 0.757, (6) 0.949 and (7) 1.320  $\mu\text{M}$  QRT. (B) Calibration plot of  $I_p$  ( $\mu\text{A}$ ) versus  $[\text{QRT}]$ .

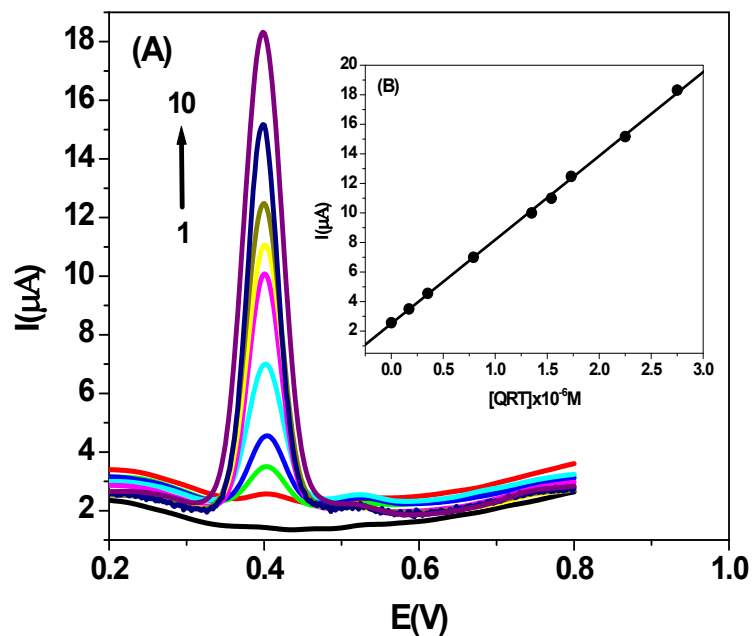

**Fig.S8.** (A) SWV of onion sample at Au/CeO<sub>2</sub>@FGCM-PE in phosphate buffer solution (pH = 3.2) (1) background (2) onion sample; standard addition of (3) 0.17, (4) 0.35 (5) 0.79, (6) 1.35, (7)1.54, (8)1.73, (9) 2.25 and (7) 2.75  $\mu\text{M}$  QRT. (B) Calibration plot of  $I_p$ ( $\mu\text{A}$ ) versus [QRT].



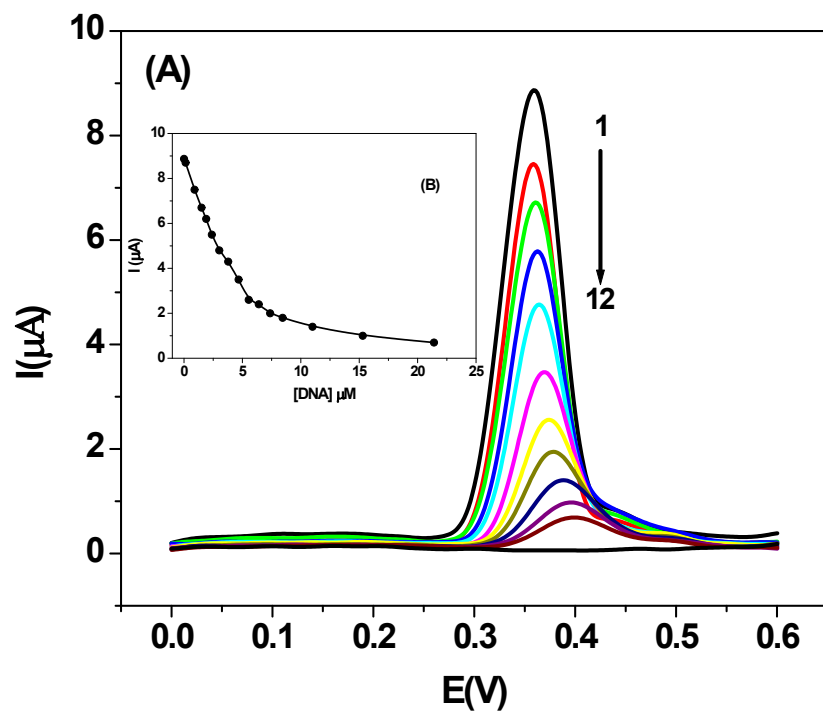

**Fig.S9.** (A) SWV of 9  $\mu\text{M}$  QRT at Au/CeO<sub>2</sub>@FGCM-PE in phosphate buffer solution (pH = 3.2) in absence (1) and presence of (2) 0.402, (3) 0.668 (4) 2.376, (5) 3.020, (6) 4.670, (7) 5.540, (8) 7.370, (9) 10.990, (10) 15.370 and (11) 21.390  $\mu\text{M}$  st-DNA; (12) background. (B) Relationship between  $I$  ( $\mu\text{A}$ ) and [st-DNA].

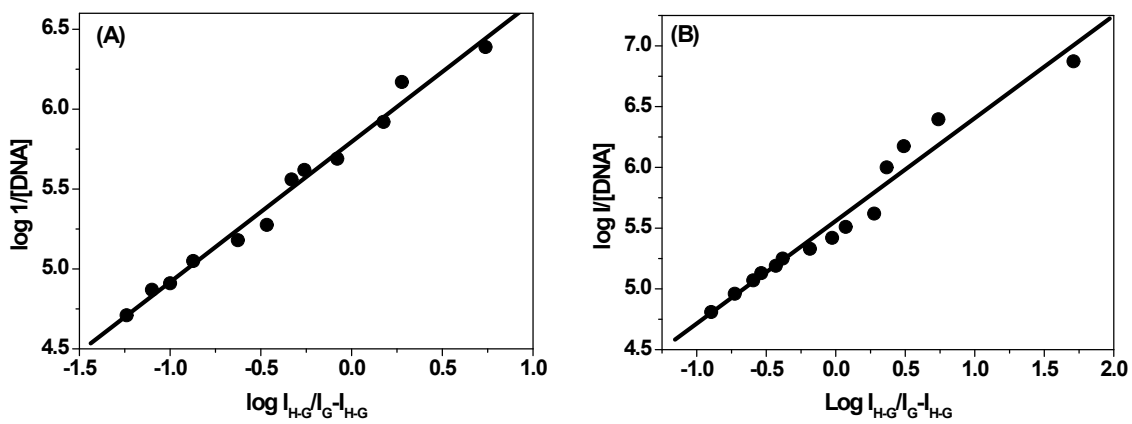

**Fig.S10.** Plot of  $\log (1/[\text{DNA}])$  vs.  $\log (I_{\text{H-G}}/I_{\text{G-I}_{\text{H-G}}})$  for (A) ct-DNA and (B) st-DNA.
